# Supplementary material for: Evaluation of Octopus maya enzyme activity of the digestive gland and gastric juice
Source: PubMed Central journal article supplement (PMC11413930; doi:10.1242/bio.060429), 2024-09-12
Supplement: biolopen-13-060429-s1.pdf [file biolopen-13-060429-s1.pdf]

**Table S1. Data for inhibition percentage calculation and t-tests of enzyme inhibitors of cathepsins B, D, H, and L.**

A statistical significance level of  $p < 0.07$  was established to evaluate the inhibition percentage by enzymatic inhibitors of cathepsins B, D, H and L, considering the variability of the enzymatic reactions and the relatively low sample size due to ethical restrictions. Inhibition was considered significant if  $p$  value was less than this threshold.

| Inhibitor                    | Cathepsin B |                  | Cathepsin D |                  | Cathepsin H |                  | Cathepsin L |                  |            |                  |
|------------------------------|-------------|------------------|-------------|------------------|-------------|------------------|-------------|------------------|------------|------------------|
|                              | E64         | Negative control | Pepstatin A | Negative control | E64         | Negative control | Leupeptin   | Negative control | E64        | Negative control |
| <b>S1</b>                    | 212.62      | 2401.76          | 3.90        | 4.49             | 0.18        | 3.16             | 8.40734E-05 | 0.14             | 0.00012326 | 0.14             |
| <b>S2</b>                    | 281.95      | 3607.56          | 5.84        | 1.80             | 0.41        | 7.94             | 0.000129529 | 0.28             | 0.00015627 | 0.28             |
| <b>S3</b>                    | 150.09      | 2631.97          | 3.60        | 4.73             | 0.00        | 2.92             | 3.56706E-05 | 0.16             | 7.8348E-05 | 0.16             |
| <b>S4</b>                    |             |                  | 5.02        | 5.72             |             |                  | 0.000116201 | 0.26             | 0.00012848 | 0.26             |
| <b>S5</b>                    |             |                  | 4.00        |                  |             |                  | 4.84518E-05 | 0.17             | 7.0059E-05 | 0.17             |
| <b>Mean</b>                  | 214.89      | 2880.43          | 4.45        | 4.19             | 0.20        | 4.67             | 8.27851E-05 | 0.20             | 0.00011128 | 0.20             |
| <b>Std. Dev.</b>             | 65.96       | 640.15           | 1.22        | 1.67             | 0.20        | 2.83             | 0.00        | 0.06             | 0.00       | 0.06             |
| <b>Inhibition percentage</b> | 92.54       |                  | -6.31       |                  | 95.76       |                  | 99.96       |                  | 99.94      |                  |
| <b>p value</b>               | 0.00        |                  | 0.28        |                  | 0.069       |                  | 0.001       |                  | 0.001      |                  |

Where **S** = sample reported in UI/mg protein

Inhibition percentage =  $[(D1 - D2)/D1 \times 100]$  where **D1** = control, **D2** = treatment (Pineda-Suazo et al., 2021; Worasatit et al., 1994).
